# Supplementary material
Source: MDPI journal article supplement (https://www.mdpi.com/1999-4907/13/3/446)
Supplement: s1 [file s1]

Archive with 8 entries (8 files):
- Video S1_NPP_PFT traits 1901-2016..mp4
- Video S2_NPP_Field traits 1901-2016.mp4
- Video S3_NPP_Variable traits 1901-2016.mp4
- Video S4_biomass_PFT traits 1901-2016.mp4
- Video S5_biomass_Field traits 1901-2016.mp4
- Video S6_biomass_Variable traits 1901-2016.mp4
- Supplementary Figures - Revision 1.pdf
- Supplementary Tables - Revision 1.pdf
