# Supplementary material
Source: MDPI journal article supplement (https://www.mdpi.com/1999-4907/13/3/446)
Supplement: s1 [file s1 › Supplementary Figures - Revision 1.pdf]

**Site1**

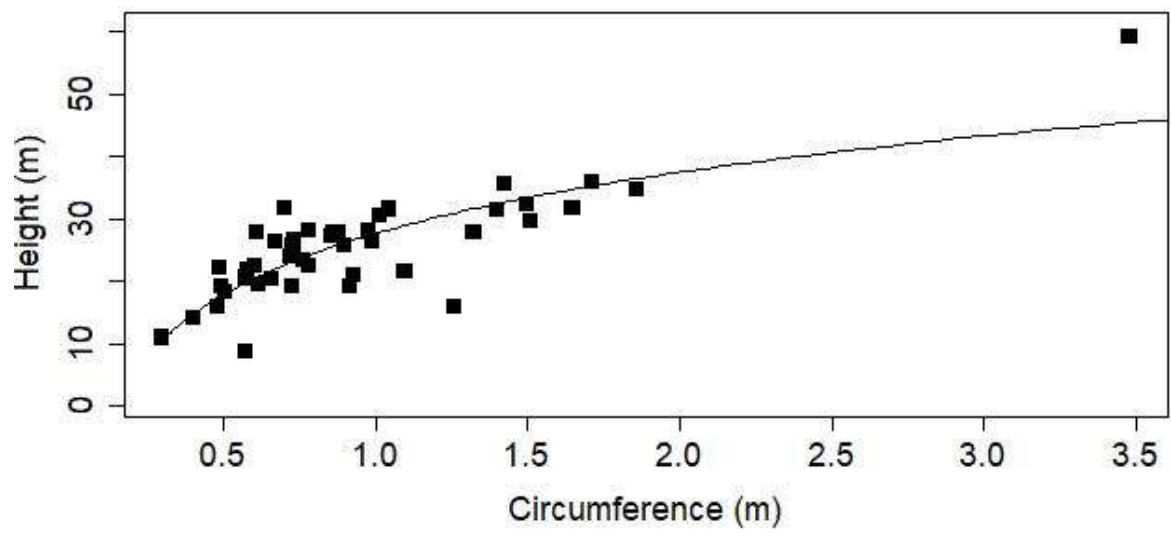

**Site2**

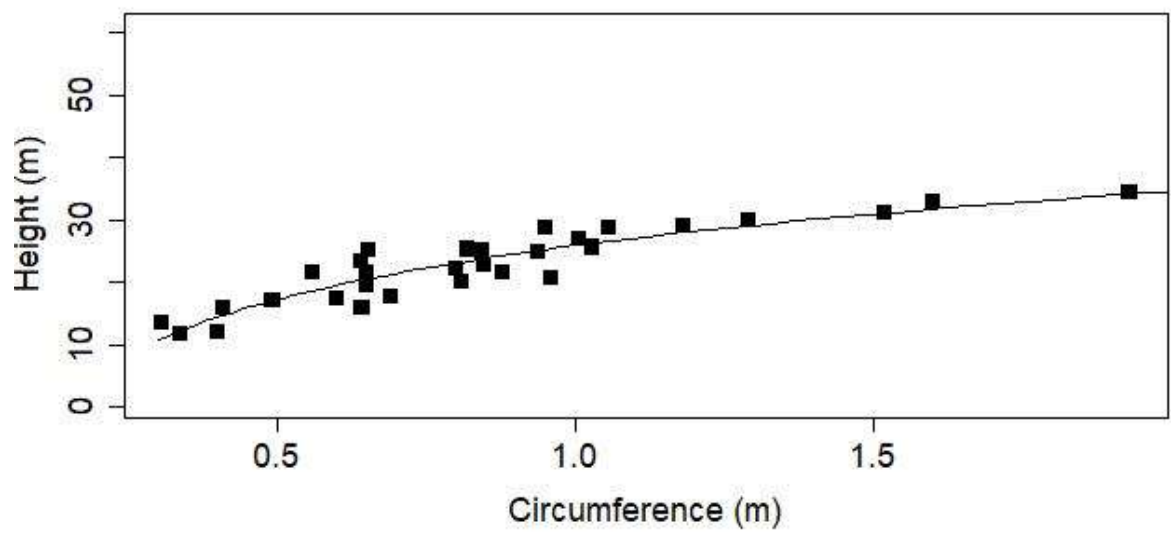

**Site3**

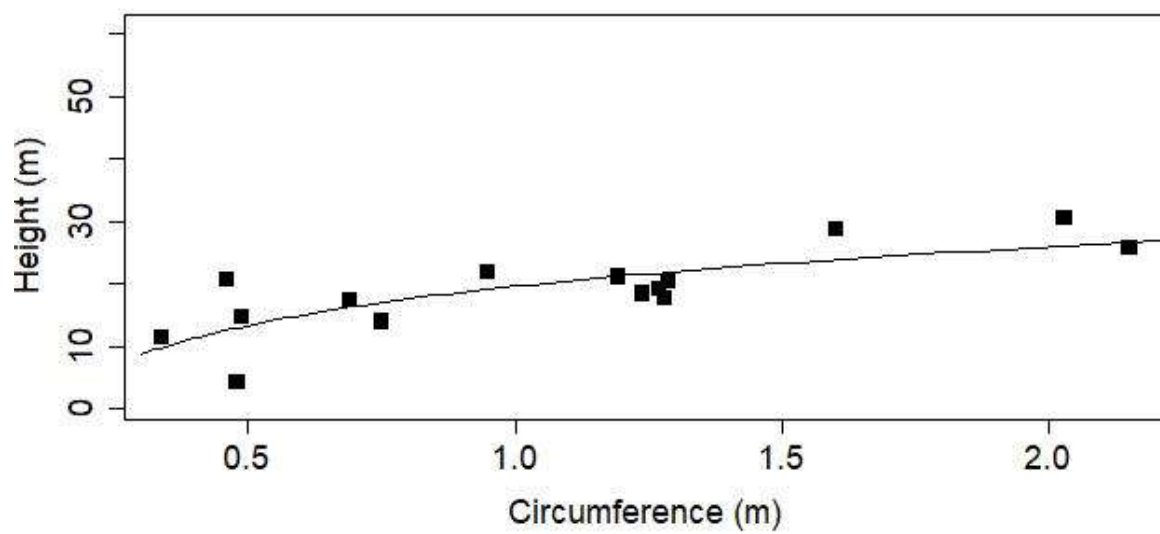

**Site4**

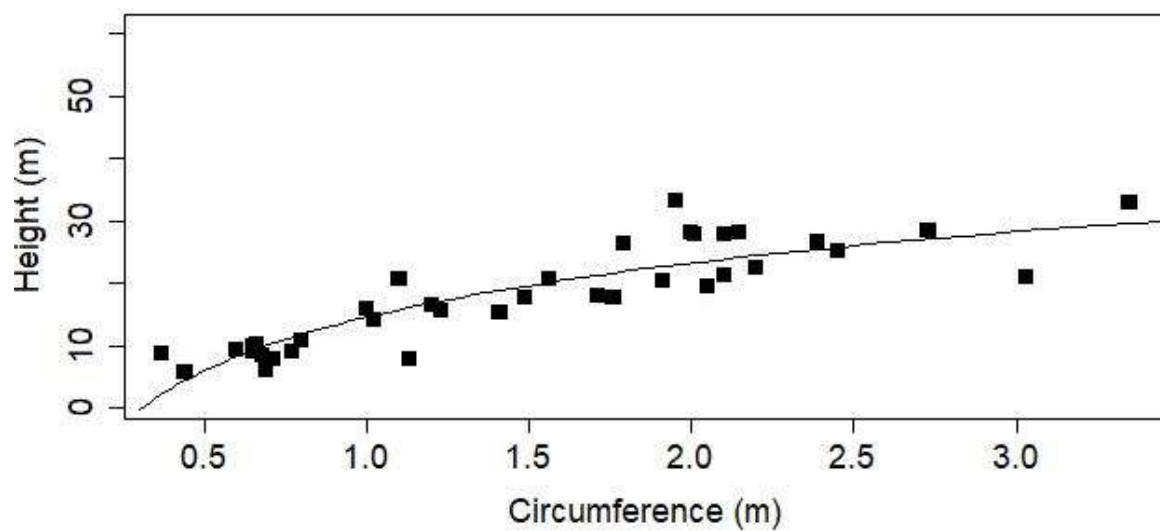

**Site5**

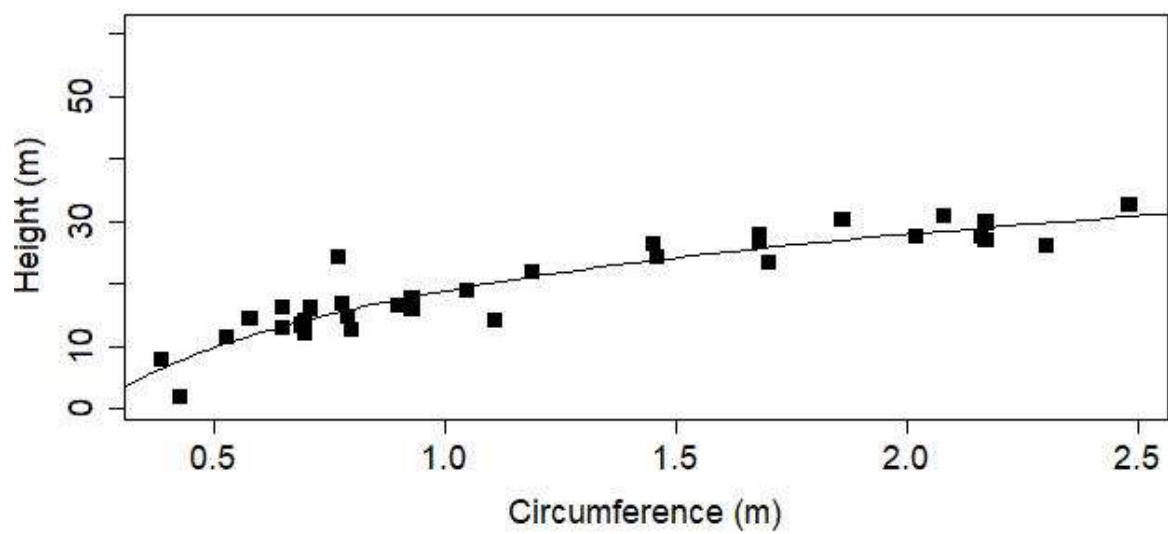

**Site6**

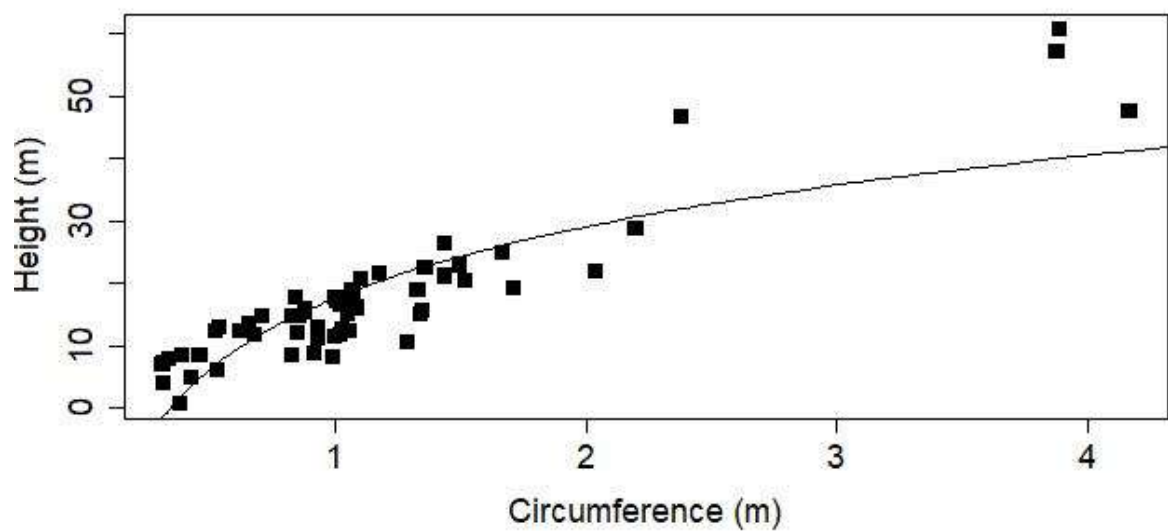

**Site7**

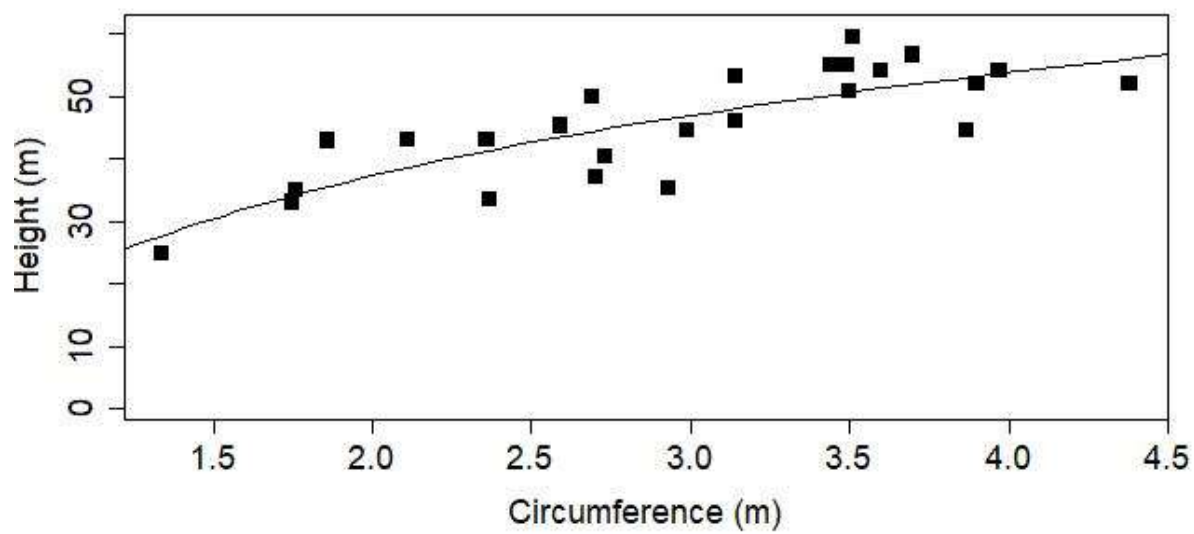

**Site8**

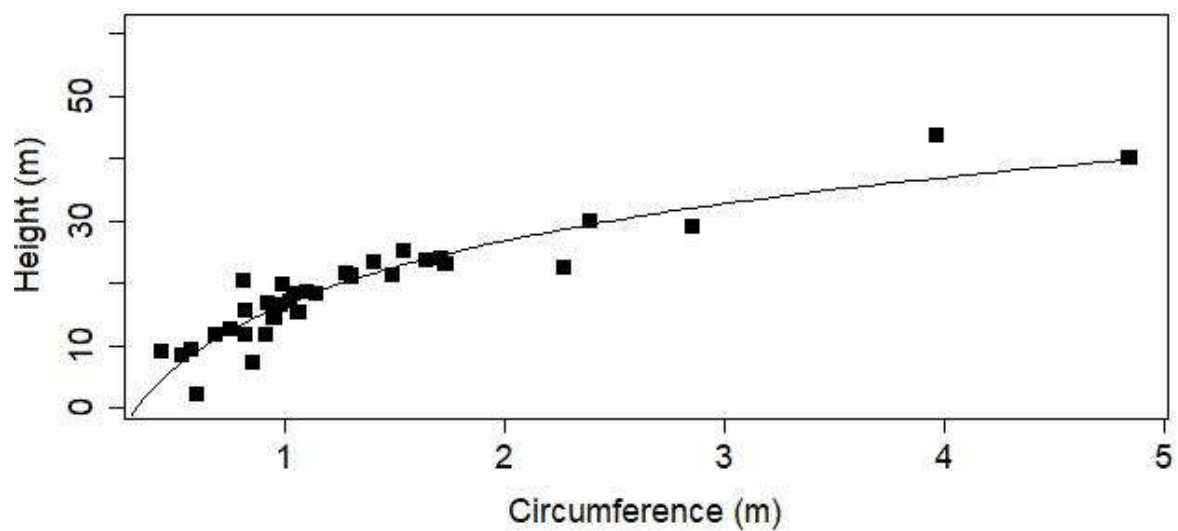

**Site9**

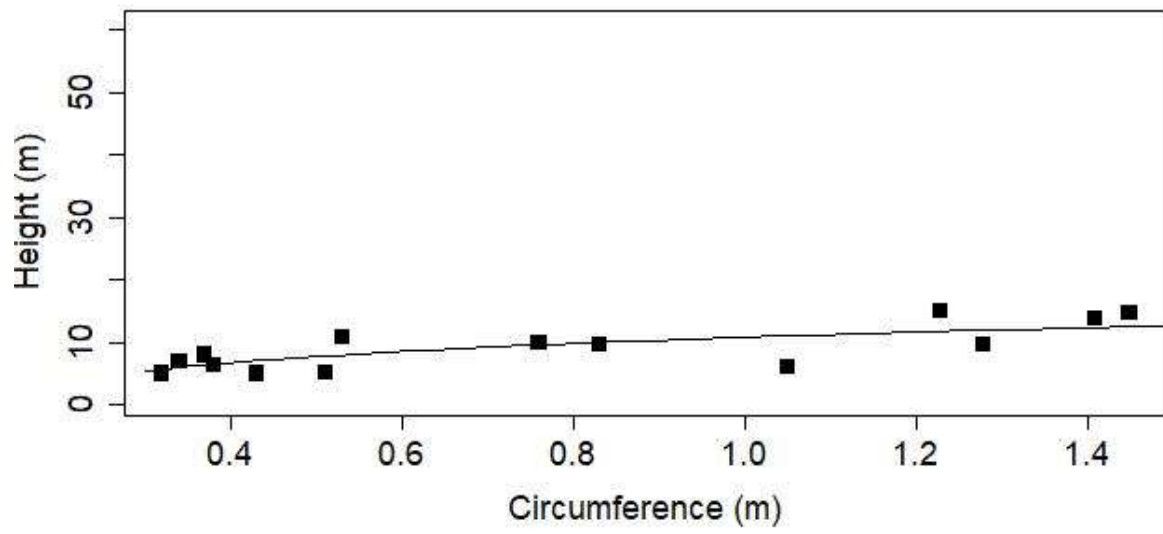

**Site10**

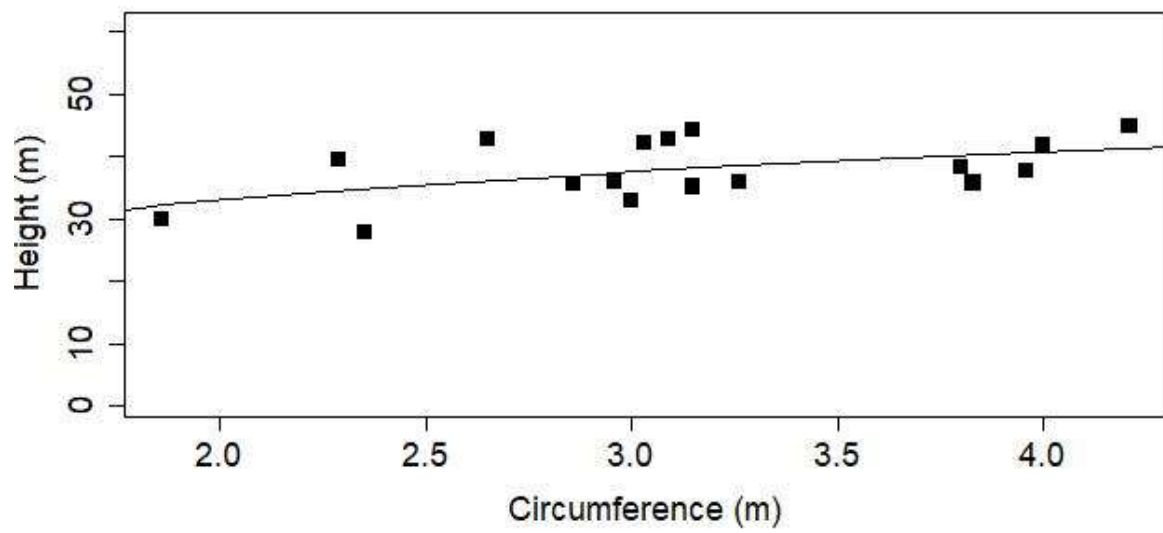

**Site11**

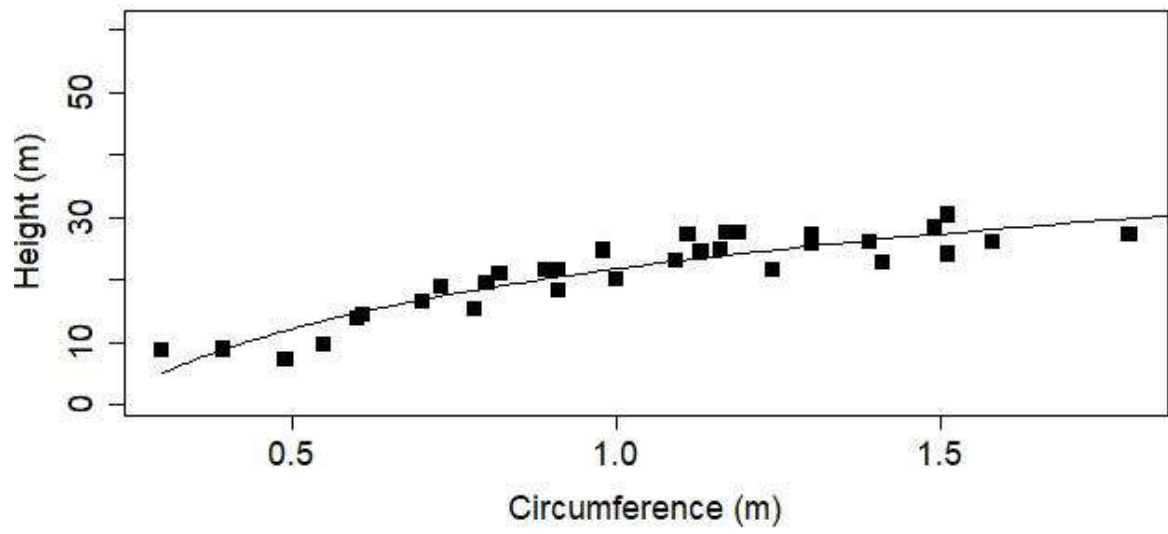

**Site12**

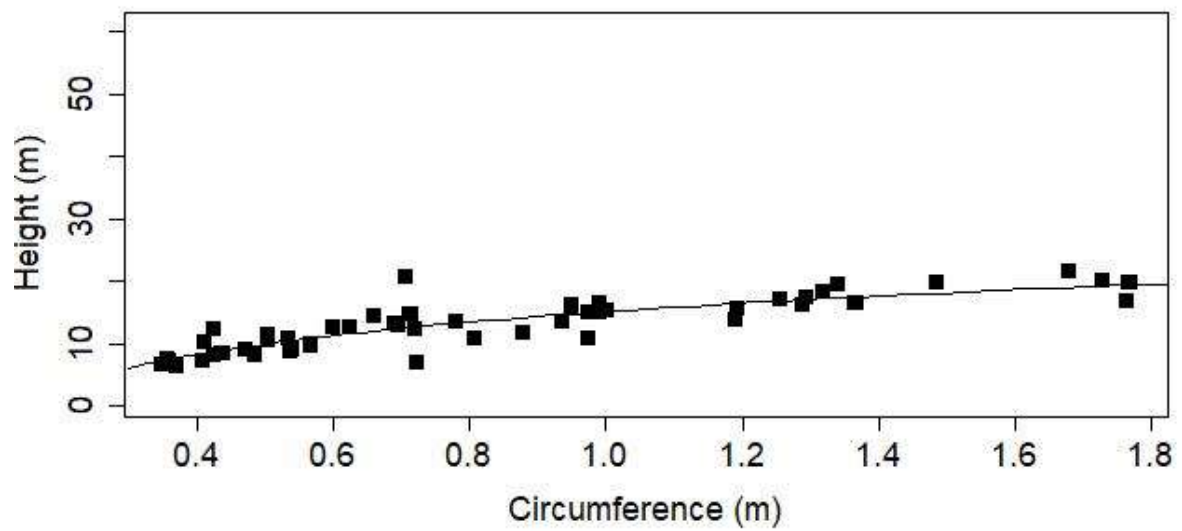

**Site13**

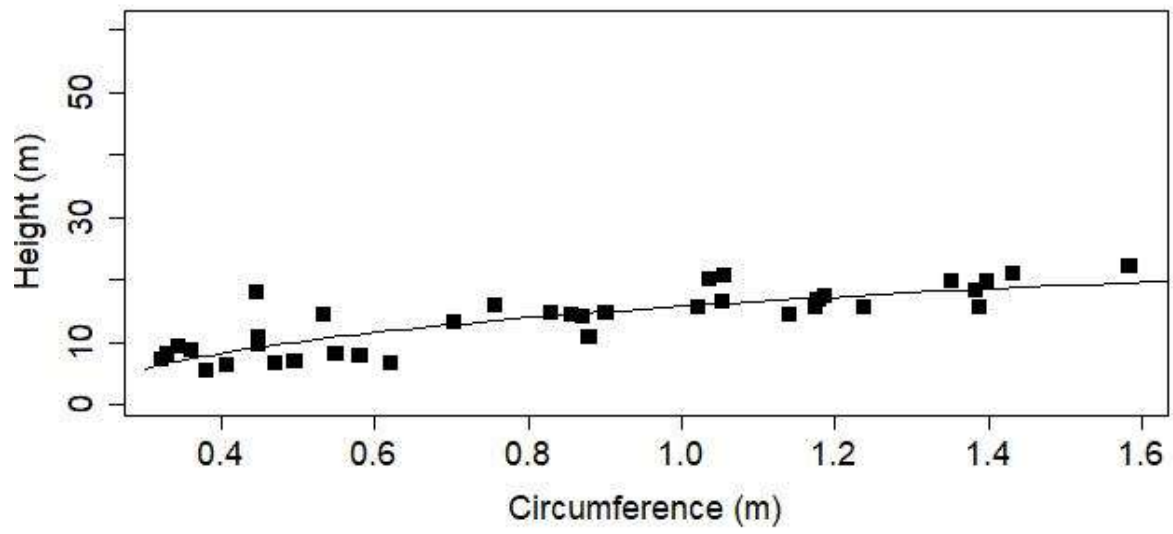

**Site14**

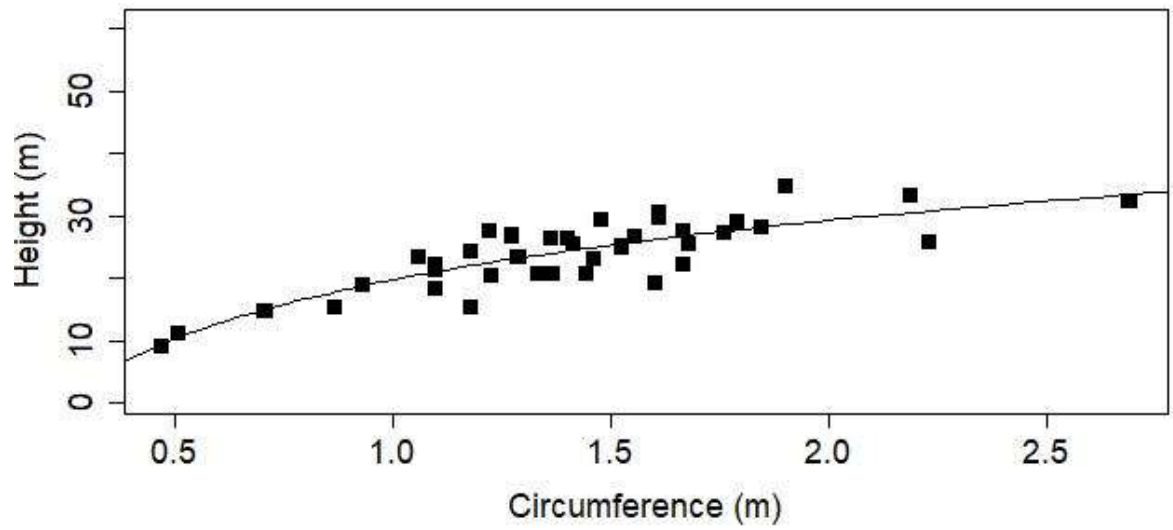

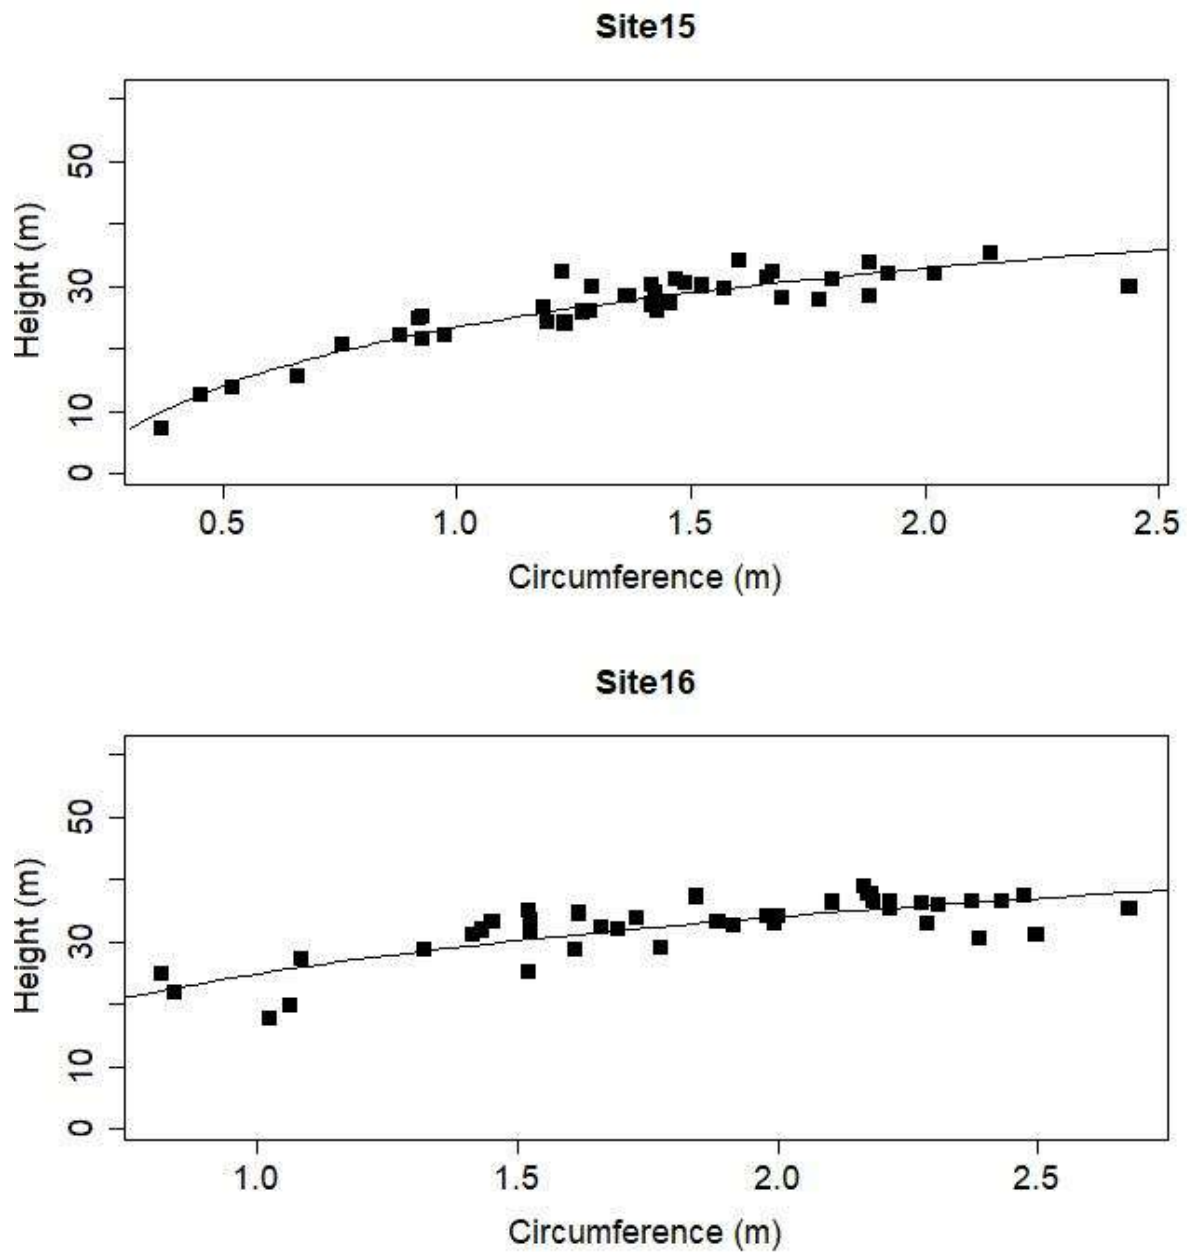

Figure S1. Relationships between *Cedrus atlantica* circumference at breast height and height per site (Table 1), with prediction lines of the models exposed in Table S1.

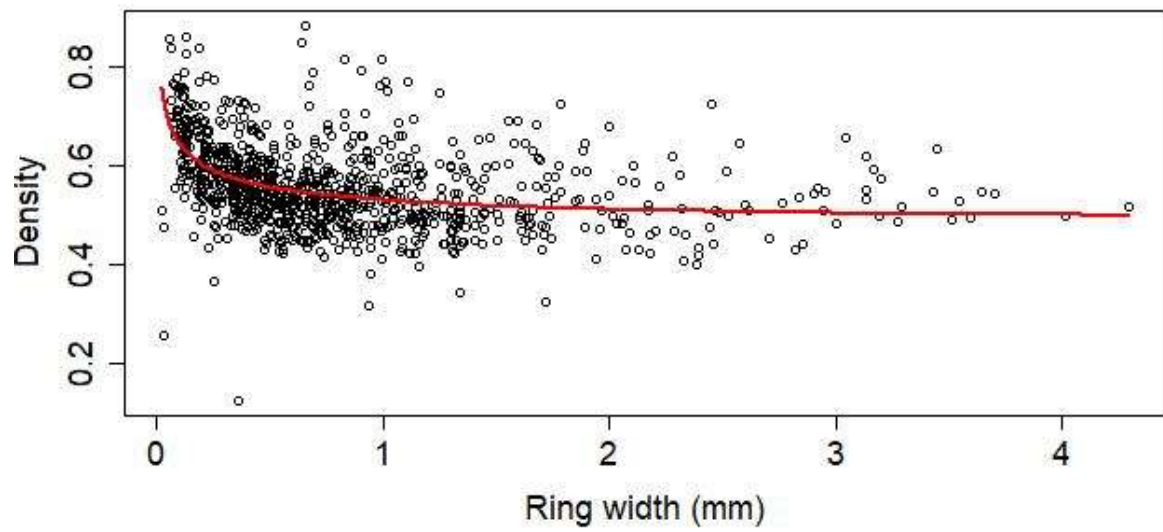

Figure S2. Relationship between ring width and wood density of 44 cores of *Cedrus atlantica* with mean prediction line of the model exposed in Table S2, without the random effect (tree identity).
