# Supplementary material
Source: MDPI journal article supplement (https://www.mdpi.com/1999-4907/13/3/446)
Supplement: s1 [file s1 › Supplementary Tables - Revision 1.pdf]

Table S1. Linear models of *Cedrus atlantica* height (hauteur, m) as a function of log of circumference (lcirconf, m) for each site (see Table 1).

#### Site1

Call:  
lm(formula = hauteur ~ 1 + lcirconf, data = datasite)

Residuals:

|  | Min      | 1Q      | Median | 3Q     | Max     |
|--|----------|---------|--------|--------|---------|
|  | -15.0555 | -1.5439 | 0.4542 | 2.2883 | 13.6456 |

Coefficients:

|             | Estimate | Std. Error | t value | Pr(> t )     |
|-------------|----------|------------|---------|--------------|
| (Intercept) | 27.648   | 0.783      | 35.31   | < 2e-16 ***  |
| lcirconf    | 14.214   | 1.619      | 8.78    | 4.69e-11 *** |

---  
Signif. codes: 0 '\*\*\*' 0.001 '\*\*' 0.01 '\*' 0.05 '.' 0.1 ' ' 1

Residual standard error: 4.897 on 42 degrees of freedom  
Multiple R-squared: 0.6473, Adjusted R-squared: 0.6389  
F-statistic: 77.1 on 1 and 42 DF, p-value: 4.692e-11

#### +++++ Site2

Call:  
lm(formula = hauteur ~ 1 + lcirconf, data = datasite)

Residuals:

|  | Min     | 1Q      | Median | 3Q     | Max    |
|--|---------|---------|--------|--------|--------|
|  | -4.6512 | -1.0565 | 0.1238 | 1.1993 | 4.5645 |

Coefficients:

|             | Estimate | Std. Error | t value | Pr(> t )     |
|-------------|----------|------------|---------|--------------|
| (Intercept) | 25.8614  | 0.4852     | 53.3    | < 2e-16 ***  |
| lcirconf    | 12.4989  | 0.9843     | 12.7    | 2.27e-13 *** |

---  
Signif. codes: 0 '\*\*\*' 0.001 '\*\*' 0.01 '\*' 0.05 '.' 0.1 ' ' 1

Residual standard error: 2.345 on 29 degrees of freedom  
Multiple R-squared: 0.8476, Adjusted R-squared: 0.8423  
F-statistic: 161.2 on 1 and 29 DF, p-value: 2.267e-13

#### +++++ Site3

Call:  
lm(formula = hauteur ~ 1 + lcirconf, data = datasite)

Residuals:

|  | Min     | 1Q      | Median  | 3Q     | Max    |
|--|---------|---------|---------|--------|--------|
|  | -8.7866 | -2.8591 | -0.1305 | 2.1434 | 8.0788 |

Coefficients:

|             | Estimate | Std. Error | t value | Pr(> t )     |
|-------------|----------|------------|---------|--------------|
| (Intercept) | 19.595   | 1.136      | 17.256  | 2.42e-10 *** |
| lcirconf    | 9.057    | 2.050      | 4.419   | 0.000693 *** |

---  
Signif. codes: 0 '\*\*\*' 0.001 '\*\*' 0.01 '\*' 0.05 '.' 0.1 ' ' 1

Residual standard error: 4.37 on 13 degrees of freedom  
Multiple R-squared: 0.6003, Adjusted R-squared: 0.5696  
F-statistic: 19.53 on 1 and 13 DF, p-value: 0.0006934

#### +++++ Site4

Call:

```
lm(formula = hauteur ~ 1 + lcirconf, data = datasite)
```

```
Residuals:
```

| Min     | 1Q      | Median  | 3Q     | Max     |
|---------|---------|---------|--------|---------|
| -8.4059 | -2.3944 | -0.2916 | 1.3125 | 10.2756 |

```
Coefficients:
```

|             | Estimate | Std. Error | t value | Pr(> t )     |
|-------------|----------|------------|---------|--------------|
| (Intercept) | 14.6015  | 0.6993     | 20.88   | < 2e-16 ***  |
| lcirconf    | 12.4236  | 1.1199     | 11.09   | 5.23e-13 *** |

```
---
```

```
Signif. codes:  0 '***' 0.001 '**' 0.01 '*' 0.05 '.' 0.1 ' ' 1
```

```
Residual standard error: 3.847 on 35 degrees of freedom
```

```
Multiple R-squared:  0.7786, Adjusted R-squared:  0.7723
```

```
F-statistic: 123.1 on 1 and 35 DF,  p-value: 5.235e-13
```

```
+++++  
Site5
```

```
Call:
```

```
lm(formula = hauteur ~ 1 + lcirconf, data = datasite)
```

```
Residuals:
```

| Min     | 1Q      | Median  | 3Q     | Max    |
|---------|---------|---------|--------|--------|
| -6.1918 | -1.6339 | -0.1888 | 1.6645 | 8.7275 |

```
Coefficients:
```

|             | Estimate | Std. Error | t value | Pr(> t )     |
|-------------|----------|------------|---------|--------------|
| (Intercept) | 18.8394  | 0.4808     | 39.19   | < 2e-16 ***  |
| lcirconf    | 13.1117  | 0.9262     | 14.16   | 1.42e-15 *** |

```
---
```

```
Signif. codes:  0 '***' 0.001 '**' 0.01 '*' 0.05 '.' 0.1 ' ' 1
```

```
Residual standard error: 2.829 on 33 degrees of freedom
```

```
Multiple R-squared:  0.8586, Adjusted R-squared:  0.8543
```

```
F-statistic: 200.4 on 1 and 33 DF,  p-value: 1.418e-15
```

```
+++++  
Site6
```

```
Call:
```

```
lm(formula = hauteur ~ 1 + lcirconf, data = datasite)
```

```
Residuals:
```

| Min      | 1Q      | Median  | 3Q     | Max     |
|----------|---------|---------|--------|---------|
| -11.4172 | -3.7046 | -0.6132 | 2.6224 | 20.7532 |

```
Coefficients:
```

|             | Estimate | Std. Error | t value | Pr(> t )     |
|-------------|----------|------------|---------|--------------|
| (Intercept) | 17.6217  | 0.8479     | 20.78   | < 2e-16 ***  |
| lcirconf    | 16.4760  | 1.4306     | 11.52   | 3.65e-16 *** |

```
---
```

```
Signif. codes:  0 '***' 0.001 '**' 0.01 '*' 0.05 '.' 0.1 ' ' 1
```

```
Residual standard error: 6.336 on 54 degrees of freedom
```

```
Multiple R-squared:  0.7107, Adjusted R-squared:  0.7053
```

```
F-statistic: 132.6 on 1 and 54 DF,  p-value: 3.651e-16
```

```
+++++  
Site7
```

```
Call:
```

```
lm(formula = hauteur ~ 1 + lcirconf, data = datasite)
```

```
Residuals:
```

| Min      | 1Q      | Median | 3Q     | Max    |
|----------|---------|--------|--------|--------|
| -11.0117 | -2.9157 | 0.4829 | 4.4816 | 8.7883 |

```
Coefficients:
```

|             | Estimate | Std. Error | t value | Pr(> t )    |
|-------------|----------|------------|---------|-------------|
| (Intercept) | 20.751   | 3.899      | 5.322   | 2.1e-05 *** |
| lcirconf    | 23.852   | 3.598      | 6.629   | 9.2e-07 *** |

---  
Signif. codes: 0 '\*\*\*' 0.001 '\*\*' 0.01 '\*' 0.05 '.' 0.1 ' ' 1

Residual standard error: 5.327 on 23 degrees of freedom  
Multiple R-squared: 0.6564, Adjusted R-squared: 0.6415  
F-statistic: 43.94 on 1 and 23 DF, p-value: 9.199e-07

+++++  
Site8

Call:  
lm(formula = hauteur ~ 1 + lcirconf, data = datasite)

Residuals:

| Min     | 1Q      | Median | 3Q     | Max    |
|---------|---------|--------|--------|--------|
| -7.0714 | -1.4357 | 0.3189 | 1.2935 | 6.7653 |

Coefficients:

|             | Estimate | Std. Error | t value | Pr(> t )     |
|-------------|----------|------------|---------|--------------|
| (Intercept) | 16.6475  | 0.5593     | 29.77   | < 2e-16 ***  |
| lcirconf    | 14.6698  | 1.0086     | 14.54   | 1.18e-15 *** |

---  
Signif. codes: 0 '\*\*\*' 0.001 '\*\*' 0.01 '\*' 0.05 '.' 0.1 ' ' 1

Residual standard error: 3.151 on 32 degrees of freedom  
Multiple R-squared: 0.8686, Adjusted R-squared: 0.8645  
F-statistic: 211.6 on 1 and 32 DF, p-value: 1.178e-15

+++++  
Site9

Call:  
lm(formula = hauteur ~ 1 + lcirconf, data = datasite)

Residuals:

| Min     | 1Q      | Median | 3Q     | Max    |
|---------|---------|--------|--------|--------|
| -5.1465 | -1.0865 | 0.1423 | 1.4519 | 3.1973 |

Coefficients:

|             | Estimate | Std. Error | t value | Pr(> t )     |
|-------------|----------|------------|---------|--------------|
| (Intercept) | 10.8128  | 0.7595     | 14.237  | 1.01e-09 *** |
| lcirconf    | 4.4824   | 1.0511     | 4.264   | 0.000786 *** |

---  
Signif. codes: 0 '\*\*\*' 0.001 '\*\*' 0.01 '\*' 0.05 '.' 0.1 ' ' 1

Residual standard error: 2.303 on 14 degrees of freedom  
Multiple R-squared: 0.565, Adjusted R-squared: 0.534  
F-statistic: 18.19 on 1 and 14 DF, p-value: 0.0007858

+++++  
Site10

Call:  
lm(formula = hauteur ~ 1 + lcirconf, data = datasite)

Residuals:

| Min    | 1Q     | Median | 3Q    | Max   |
|--------|--------|--------|-------|-------|
| -6.949 | -2.862 | -1.489 | 4.398 | 6.551 |

Coefficients:

|             | Estimate | Std. Error | t value | Pr(> t )     |
|-------------|----------|------------|---------|--------------|
| (Intercept) | 25.132   | 5.748      | 4.372   | 0.000546 *** |
| lcirconf    | 11.263   | 5.025      | 2.241   | 0.040566 *   |

---  
Signif. codes: 0 '\*\*\*' 0.001 '\*\*' 0.01 '\*' 0.05 '.' 0.1 ' ' 1

Residual standard error: 4.413 on 15 degrees of freedom

Multiple R-squared: 0.2509, Adjusted R-squared: 0.2009  
F-statistic: 5.023 on 1 and 15 DF, p-value: 0.04057

++++  
Site11

Call:  
lm(formula = hauteur ~ 1 + lcirconf, data = datasite)

Residuals:  
Min 1Q Median 3Q Max  
-4.7054 -2.0341 0.2235 1.5737 3.9771

Coefficients:  
Estimate Std. Error t value Pr(>|t|)  
(Intercept) 21.743 0.449 48.42 < 2e-16 \*\*\*  
lcirconf 13.854 1.068 12.98 7.71e-14 \*\*\*  
---

Signif. codes: 0 '\*\*\*' 0.001 '\*\*' 0.01 '\*' 0.05 '.' 0.1 ' ' 1

Residual standard error: 2.521 on 30 degrees of freedom  
Multiple R-squared: 0.8488, Adjusted R-squared: 0.8437  
F-statistic: 168.4 on 1 and 30 DF, p-value: 7.712e-14

++++  
Site12

Call:  
lm(formula = hauteur ~ 1 + lcirconf, data = datasite)

Residuals:  
Min 1Q Median 3Q Max  
-5.7877 -1.1280 0.1199 1.0318 8.1003

Coefficients:  
Estimate Std. Error t value Pr(>|t|)  
(Intercept) 15.1279 0.3493 43.31 < 2e-16 \*\*\*  
lcirconf 7.4605 0.6339 11.77 1.29e-15 \*\*\*  
---

Signif. codes: 0 '\*\*\*' 0.001 '\*\*' 0.01 '\*' 0.05 '.' 0.1 ' ' 1

Residual standard error: 2.123 on 47 degrees of freedom  
Multiple R-squared: 0.7466, Adjusted R-squared: 0.7412  
F-statistic: 138.5 on 1 and 47 DF, p-value: 1.294e-15

++++  
Site13

Call:  
lm(formula = hauteur ~ 1 + lcirconf, data = datasite)

Residuals:  
Min 1Q Median 3Q Max  
-5.2786 -2.3136 0.0577 1.5299 8.8095

Coefficients:  
Estimate Std. Error t value Pr(>|t|)  
(Intercept) 15.7588 0.5329 29.57 < 2e-16 \*\*\*  
lcirconf 8.2363 0.9391 8.77 1.83e-10 \*\*\*  
---

Signif. codes: 0 '\*\*\*' 0.001 '\*\*' 0.01 '\*' 0.05 '.' 0.1 ' ' 1

Residual standard error: 2.815 on 36 degrees of freedom  
Multiple R-squared: 0.6812, Adjusted R-squared: 0.6723  
F-statistic: 76.92 on 1 and 36 DF, p-value: 1.83e-10

++++  
Site14

Call:

```
lm(formula = hauteur ~ 1 + lcirconf, data = datasite)
```

```
Residuals:
```

| Min     | 1Q      | Median | 3Q     | Max    |
|---------|---------|--------|--------|--------|
| -7.0352 | -2.0681 | 0.1675 | 2.2738 | 5.9823 |

```
Coefficients:
```

|             | Estimate | Std. Error | t value | Pr(> t )     |
|-------------|----------|------------|---------|--------------|
| (Intercept) | 19.7603  | 0.6645     | 29.739  | < 2e-16 ***  |
| lcirconf    | 13.7485  | 1.4694     | 9.356   | 2.72e-11 *** |

```
---
```

```
Signif. codes:  0 '***' 0.001 '**' 0.01 '*' 0.05 '.' 0.1 ' ' 1
```

```
Residual standard error: 3.175 on 37 degrees of freedom
```

```
Multiple R-squared:  0.7029, Adjusted R-squared:  0.6949
```

```
F-statistic: 87.54 on 1 and 37 DF,  p-value: 2.724e-11
```

```
+++++  
Site15
```

```
Call:
```

```
lm(formula = hauteur ~ 1 + lcirconf, data = datasite)
```

```
Residuals:
```

| Min     | 1Q      | Median  | 3Q     | Max    |
|---------|---------|---------|--------|--------|
| -5.6641 | -1.1241 | -0.0975 | 1.3891 | 6.1298 |

```
Coefficients:
```

|             | Estimate | Std. Error | t value | Pr(> t )   |
|-------------|----------|------------|---------|------------|
| (Intercept) | 23.4559  | 0.4132     | 56.77   | <2e-16 *** |
| lcirconf    | 13.5695  | 0.8768     | 15.48   | <2e-16 *** |

```
---
```

```
Signif. codes:  0 '***' 0.001 '**' 0.01 '*' 0.05 '.' 0.1 ' ' 1
```

```
Residual standard error: 2.275 on 39 degrees of freedom
```

```
Multiple R-squared:  0.86, Adjusted R-squared:  0.8564
```

```
F-statistic: 239.5 on 1 and 39 DF,  p-value: < 2.2e-16
```

```
+++++  
Site16
```

```
Call:
```

```
lm(formula = hauteur ~ 1 + lcirconf, data = datasite)
```

```
Residuals:
```

| Min     | 1Q      | Median | 3Q     | Max    |
|---------|---------|--------|--------|--------|
| -7.6139 | -0.7320 | 0.2499 | 1.6722 | 4.5142 |

```
Coefficients:
```

|             | Estimate | Std. Error | t value | Pr(> t )     |
|-------------|----------|------------|---------|--------------|
| (Intercept) | 24.849   | 1.001      | 24.831  | < 2e-16 ***  |
| lcirconf    | 13.193   | 1.564      | 8.437   | 2.04e-10 *** |

```
---
```

```
Signif. codes:  0 '***' 0.001 '**' 0.01 '*' 0.05 '.' 0.1 ' ' 1
```

```
Residual standard error: 2.94 on 40 degrees of freedom
```

```
Multiple R-squared:  0.6402, Adjusted R-squared:  0.6312
```

```
F-statistic: 71.18 on 1 and 40 DF,  p-value: 2.042e-10
```

```
+++++
```

**Table S2.** Linear mixed model of *Cedrus atlantica* wood density (densitym) as a function of linear and quadratic effects of the log of ring width (lwidth in m and lwidth2 in m<sup>2</sup>, respectively) and tree diameter at breast height (dbh, m) as fixed effects and tree identity (tree) as random effect.

Linear mixed model fit by REML ['lmerMod']

Formula: densitym ~ 1 + lwidth + lwidth2 + dbh + (1 | tree)

Data: wd

REML criterion at convergence: -2348.2

Scaled residuals:

| Min     | 1Q      | Median  | 3Q     | Max    |
|---------|---------|---------|--------|--------|
| -7.5678 | -0.4975 | -0.0809 | 0.5084 | 4.2034 |

Random effects:

| Groups   | Name        | Variance | Std.Dev. |
|----------|-------------|----------|----------|
| tree     | (Intercept) | 0.001672 | 0.04089  |
| Residual |             | 0.004002 | 0.06326  |

Number of obs: 921, groups: tree, 44

Fixed effects:

|             | Estimate  | Std. Error | t value | Pr(> t ) |     |
|-------------|-----------|------------|---------|----------|-----|
| (Intercept) | 0.568018  | 0.010839   | 52.404  | < 2e-16  | *** |
| lwidth      | -0.032469 | 0.005460   | -5.946  | 5.06e-09 | *** |
| lwidth2     | 0.007769  | 0.002512   | 3.093   | 0.00206  | **  |
| dbh         | -0.093230 | 0.023239   | -4.012  | 0.00025  | *** |

Correlation of Fixed Effects:

|         | (Intr) | lwidth | lwidth2 |
|---------|--------|--------|---------|
| lwidth  | -0.049 |        |         |
| lwidth2 | -0.132 | 0.795  |         |
| dbh     | -0.780 | -0.008 | 0.027   |

Table S3. Traits estimated for each site

| Site # | Region       | Specific leaf area<br>sq. cm/g | Leaf C:N<br>g/g | Sapwood C:N<br>g/g |
|--------|--------------|--------------------------------|-----------------|--------------------|
| 1      | Rif          | 58.79                          | 37.05           | 643.94             |
| 2      | Rif          | 52.9                           | 41.33           | 580.87             |
| 3      | Rif          | 46.03                          | 60.24           | 595.24             |
| 4      | Middle Atlas | 52.35                          | 45.8            | 149.49             |
| 5      | Middle Atlas | 60.34                          | 42.15           | 297.51             |
| 6      | Middle Atlas | 57.1                           | 45.21           | 437.62             |
| 7      | Middle Atlas | 50.48                          | 40.19           | 277.24             |
| 8      | Middle Atlas | 56.27                          | 48.07           | 315.2              |
| 9      | Middle Atlas | 53.76                          | 51.05           | 412.29             |
| 10     | Middle Atlas | 45.74                          | 45.68           | 335.16             |
| 11     | Middle Atlas | 51.2                           | 52.78           | 434.31             |
| 12     | Rif          | 45.8                           | 61.35           | 439.32             |
| 13     | Rif          | 42.33                          | 48.21           | 437.5              |
| 14     | Middle Atlas | 51.6                           | 39              | 470.8              |
| 15     | Middle Atlas | 42.3                           | 41.19           | 504.17             |
| 16     | Middle Atlas | 43.64                          | 41.61           | 500.52             |

**Table S4.** Linear models of three traits (specific leaf area, leaf C:N and sapwood C:N) as a function of climate factors (means over 2014, 2015 and 2016 of precipitation: prc, of daily temperature range: dte, of temperature: tem, of sunshine hours: shr, wind speed: wnd, of potential evapotranspiration: pet, of relative humidity: rhu) effects (linear effects and pairwise interactions). Best models (with maximum 5 terms for sample sizes = 16) after exhaustive searches and selections on the basis of AIC and F tests

Dependent variable: Specific leaf area

Residuals:

| Min     | 1Q      | Median  | 3Q     | Max    |
|---------|---------|---------|--------|--------|
| -4.6246 | -2.6909 | -0.8697 | 1.6137 | 8.1141 |

Coefficients:

|             | Estimate  | Std. Error | t value | Pr(> t )   |
|-------------|-----------|------------|---------|------------|
| (Intercept) | 101.92593 | 36.02038   | 2.830   | 0.01786 *  |
| prc         | -0.33714  | 0.08410    | -4.009  | 0.00248 ** |
| shr         | 28.51272  | 21.12181   | 1.350   | 0.20680    |
| prc:shr     | -0.04793  | 0.03157    | -1.518  | 0.15999    |
| tem:dte     | -1.13449  | 0.36338    | -3.122  | 0.01084 *  |
| prc:tem     | 0.04271   | 0.01371    | 3.115   | 0.01097 *  |

---  
Signif. codes: 0 '\*\*\*' 0.001 '\*\*' 0.01 '\*' 0.05 '.' 0.1 ' ' 1

Residual standard error: 4.191 on 10 degrees of freedom

Multiple R-squared: 0.6551, Adjusted R-squared: 0.4826

F-statistic: 3.798 on 5 and 10 DF, p-value: 0.03451

+++++  
Dependent variable: Leaf C:N

Residuals:

| Min     | 1Q      | Median | 3Q     | Max    |
|---------|---------|--------|--------|--------|
| -5.6949 | -0.9922 | 0.0846 | 1.7691 | 2.7622 |

Coefficients:

|             | Estimate   | Std. Error | t value | Pr(> t )     |
|-------------|------------|------------|---------|--------------|
| (Intercept) | -146.50095 | 31.07147   | -4.715  | 0.000635 *** |
| prc         | 0.97443    | 0.10517    | 9.266   | 1.58e-06 *** |
| prc:tem     | -0.08982   | 0.01054    | -8.525  | 3.55e-06 *** |
| wnd:rhu     | -0.93009   | 0.11324    | -8.214  | 5.08e-06 *** |
| tem:wnd     | 10.72044   | 1.31609    | 8.146   | 5.50e-06 *** |

---  
Signif. codes: 0 '\*\*\*' 0.001 '\*\*' 0.01 '\*' 0.05 '.' 0.1 ' ' 1

Residual standard error: 2.511 on 11 degrees of freedom

Multiple R-squared: 0.9088, Adjusted R-squared: 0.8756

F-statistic: 27.4 on 4 and 11 DF, p-value: 1.144e-05

+++++  
Dependent variable: Sapwood C:N

Residuals:

| Min     | 1Q     | Median | 3Q    | Max    |
|---------|--------|--------|-------|--------|
| -156.74 | -20.32 | -10.03 | 42.35 | 120.05 |

Coefficients:

|             | Estimate   | Std. Error | t value | Pr(> t )   |
|-------------|------------|------------|---------|------------|
| (Intercept) | -1086.6345 | 493.1687   | -2.203  | 0.04785 *  |
| shr:prc     | -0.4740    | 0.1522     | -3.115  | 0.00893 ** |
| wnd:rhu     | 6.4534     | 3.1204     | 2.068   | 0.06089 .  |
| shr:wnd     | 108.2430   | 31.6157    | 3.424   | 0.00504 ** |

---  
Signif. codes: 0 '\*\*\*' 0.001 '\*\*' 0.01 '\*' 0.05 '.' 0.1 ' ' 1

Residual standard error: 75.74 on 12 degrees of freedom

Multiple R-squared: 0.7248, Adjusted R-squared: 0.656

F-statistic: 10.53 on 3 and 12 DF, p-value: 0.001114

**Table S5.** Estimations of mean biomass for 2013 to 2017 (kg C/sq. m) and of net primary productivity (NPP) for years 2012 to 2016 (g C/sq. m/yr).

| Site # | Region       | Biomass<br>2013-2017 | NPP<br>2016 | NPP<br>2015 | NPP<br>2014 | NPP<br>2013 | NPP<br>2012 |
|--------|--------------|----------------------|-------------|-------------|-------------|-------------|-------------|
| 1      | Rif          | 190.3                | 736.7       | 691.0       | 640.2       | 594.7       | 601.4       |
| 2      | Rif          | 78.9                 | 266.2       | 261.9       | 255.0       | 257.3       | 270.5       |
| 3      | Rif          | 114.6                | 187.9       | 112.4       | 159.8       | 87.8        | 185.7       |
| 4      | Middle Atlas | 151.8                | 165.3       | 210.8       | 194.1       | 156.7       | 180.9       |
| 5      | Middle Atlas | 162.4                | 29.4        | 399.0       | 390.0       | 284.0       | 247.1       |
| 6      | Middle Atlas | 249.3                | 209.8       | 224.8       | 238.4       | 210.8       | 200.7       |
| 7      | Middle Atlas | 393.4                | 225.9       | 273.3       | 232.8       | 222.4       | 221.4       |
| 8      | Middle Atlas | 193.1                | 197.7       | 271.0       | 265.0       | 307.0       | 230.8       |
| 9      | Middle Atlas | 11.2                 | 20.0        | 24.5        | 26.1        | 30.3        | 31.3        |
| 10     | Middle Atlas | 267.6                | 73.1        | 85.6        | 80.5        | 91.56       | 81.2        |
| 11     | Middle Atlas | 197.6                | 152.8       | 307.3       | 289.4       | 367.1       | 260.7       |
| 12     | Rif          | 86.7                 | 80.0        | 120.3       | 107.3       | 138.8       | 93.3        |
| 13     | Rif          | 116.0                | 158.3       | 140.3       | 142.3       | 114.7       | 97.7        |
| 14     | Middle Atlas | 149.4                | 131.9       | 186.5       | 159.4       | 173.8       | 155.6       |
| 15     | Middle Atlas | 165.7                | 219.6       | 265.3       | 283.4       | 274.4       | 273.1       |
| 16     | Middle Atlas | 345.1                | 253.6       | 352.1       | 364.5       | 413.1       | 372.4       |
